# Supplementary material for: Polymer lithium–sulfur batteries with a Nafion membrane and an advanced sulfur electrode
Source: Royal Society of Chemistry journal article supplement (doi:10.1039/c5ta04289e), 2015-01-01
Supplement: c5ta04289e1.pdf [file c5ta04289e1.pdf]

## Supplementary Information

for *Journal of Materials Chemistry A*, DOI: 10.1039/ ((please add manuscript number))

### Polymer Lithium-Sulfur Batteries with a Nafion Membrane and an Advanced Sulfur Electrode

Xingwen Yu, Jorphin Joseph and Arumugam Manthiram\*

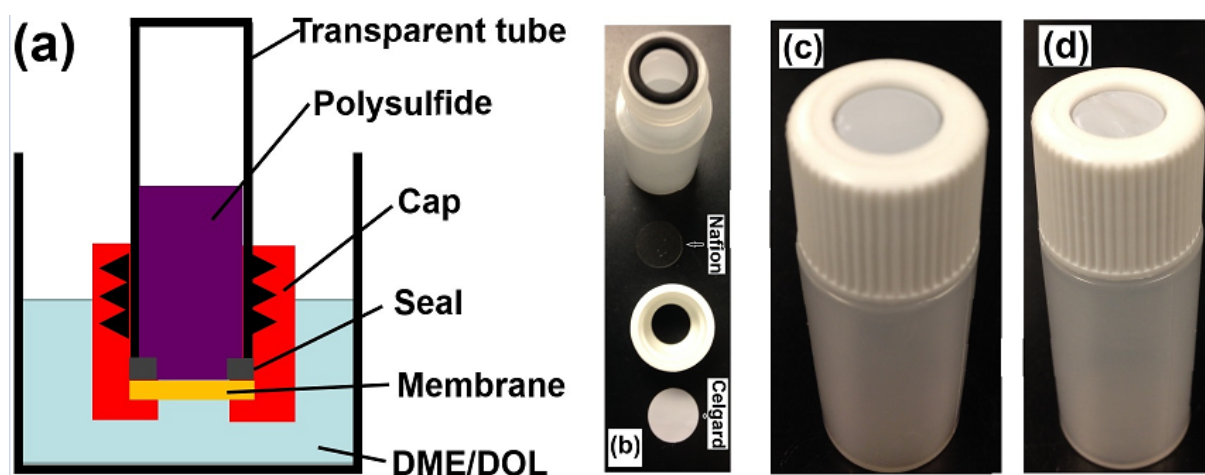

**Fig. S1.** (a) Schematic of a setup for polysulfide permeation tests. (b) Apparatus for the polysulfide permeation experiments. (c) Photograph of the sealed transparent tube with a piece of lithiated Nafion membrane embedded. (d) Photograph of the sealed transparent tube with a piece of Celgard membrane embedded.

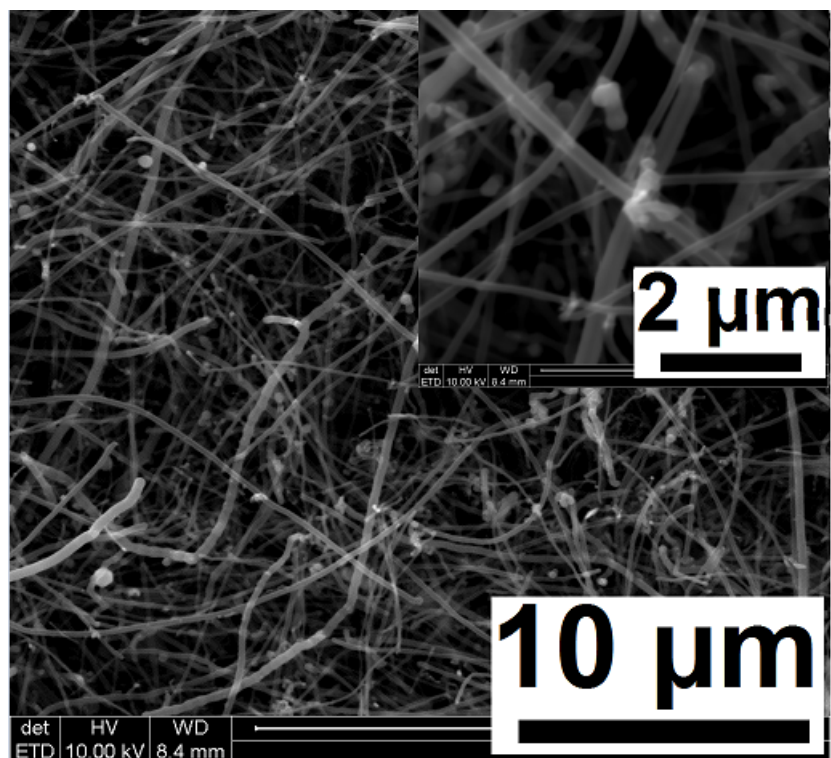

**Fig. S2.** Scanning electron microscopy (SEM) image of an as-prepared carbon nanofiber (CNF) paper electrode (without activation process).

**Table S1.** The Brunauer–Emmett–Teller (BET) surface area and pore volume of the un-activated versus CO<sub>2</sub>-activated CNF paper electrodes.

|                                                  | Unactivated CNF paper | CO <sub>2</sub> -activated CNF paper |
|--------------------------------------------------|-----------------------|--------------------------------------|
| BET surface area, m <sup>2</sup> g <sup>-1</sup> | 41                    | 714                                  |
| Pore volume, m <sup>3</sup> g <sup>-1</sup>      | 0.14                  | 1.06                                 |

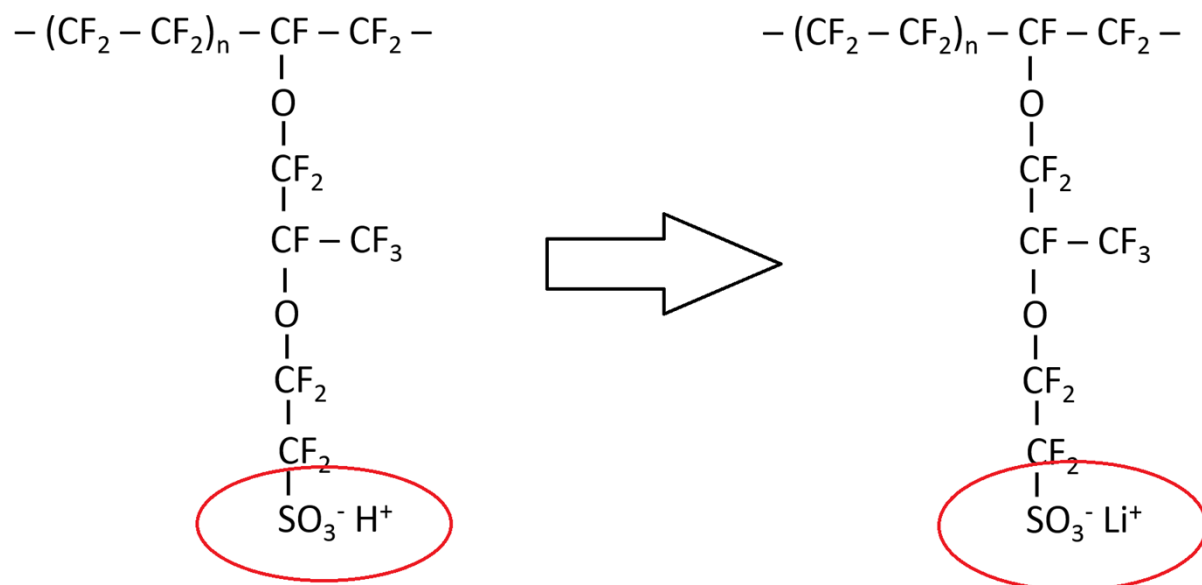

**Fig. S3.** Molecular structures of the original Nafion and lithiated Nafion materials.

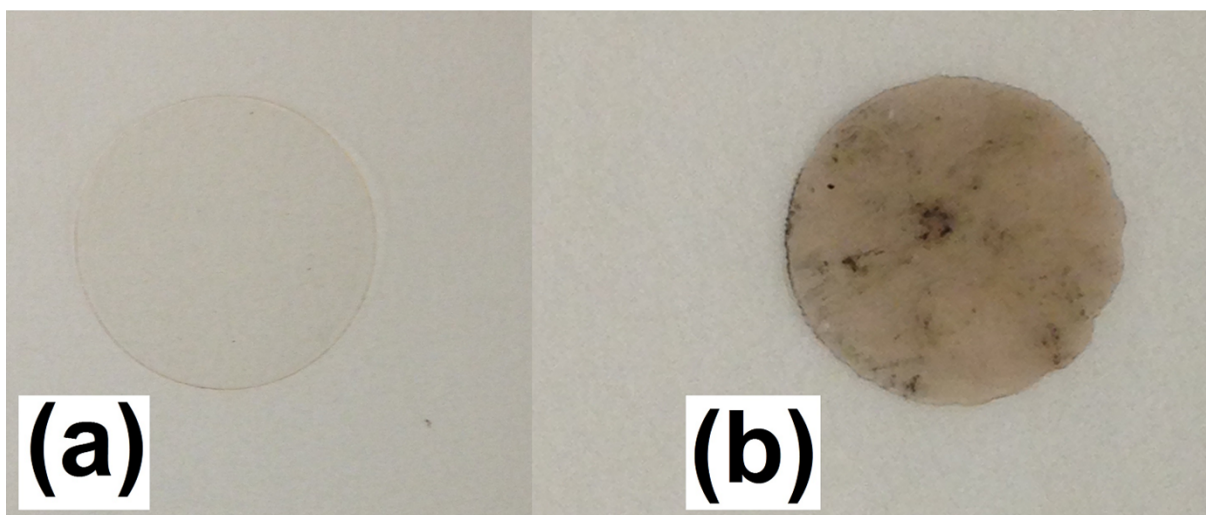

**Fig. S4.** Pictures of (a) a piece of fresh Nafion membrane and (b) a piece of cycled (after 500 cycles at C/5 rate) Nafion membrane taken out from a Li || Nafion / CNF interlayer || AC-CNF/lithium polysulfide cell.

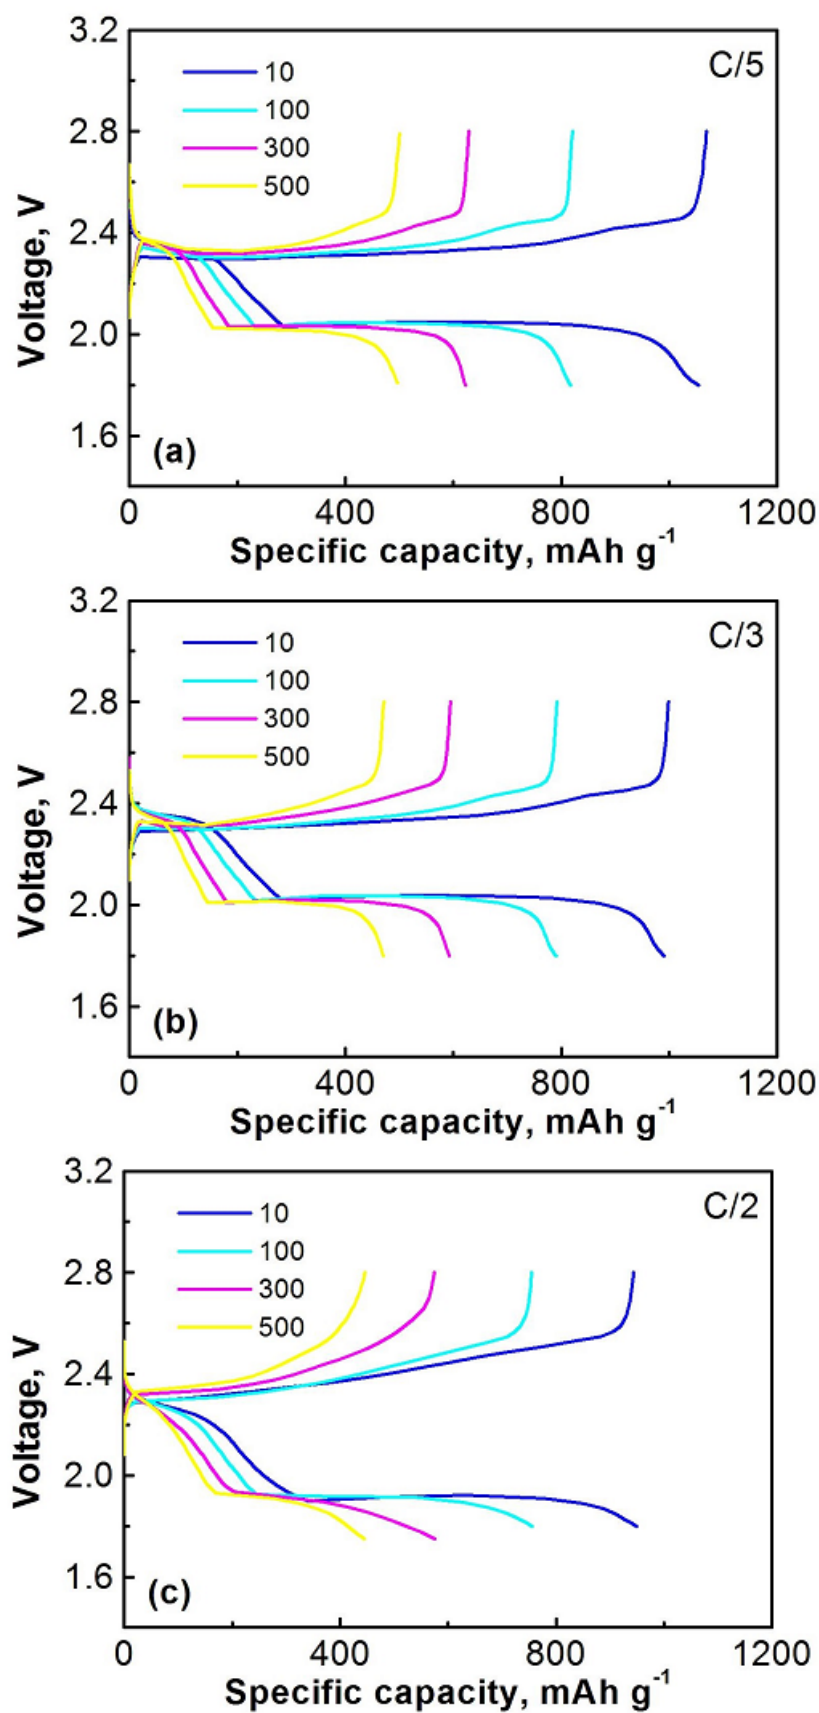

**Fig. S5.** Charge/discharge profiles of the Li || Nafion / CNF interlayer || AC-CNF/lithium polysulfide batteries at different representative cycles (10, 100, 300, and 500 cycles) at (a) C/10, (b) C/5, and (c) C/3 rates.
